# Supplementary material
Source: Springer Nature journal article supplement (https://www.springermedizin.de/resource/supplementary/12984_2010_245_MOESM4_ESM.pdf/9605608)

Hurst ss-exponent  $\alpha(X)$

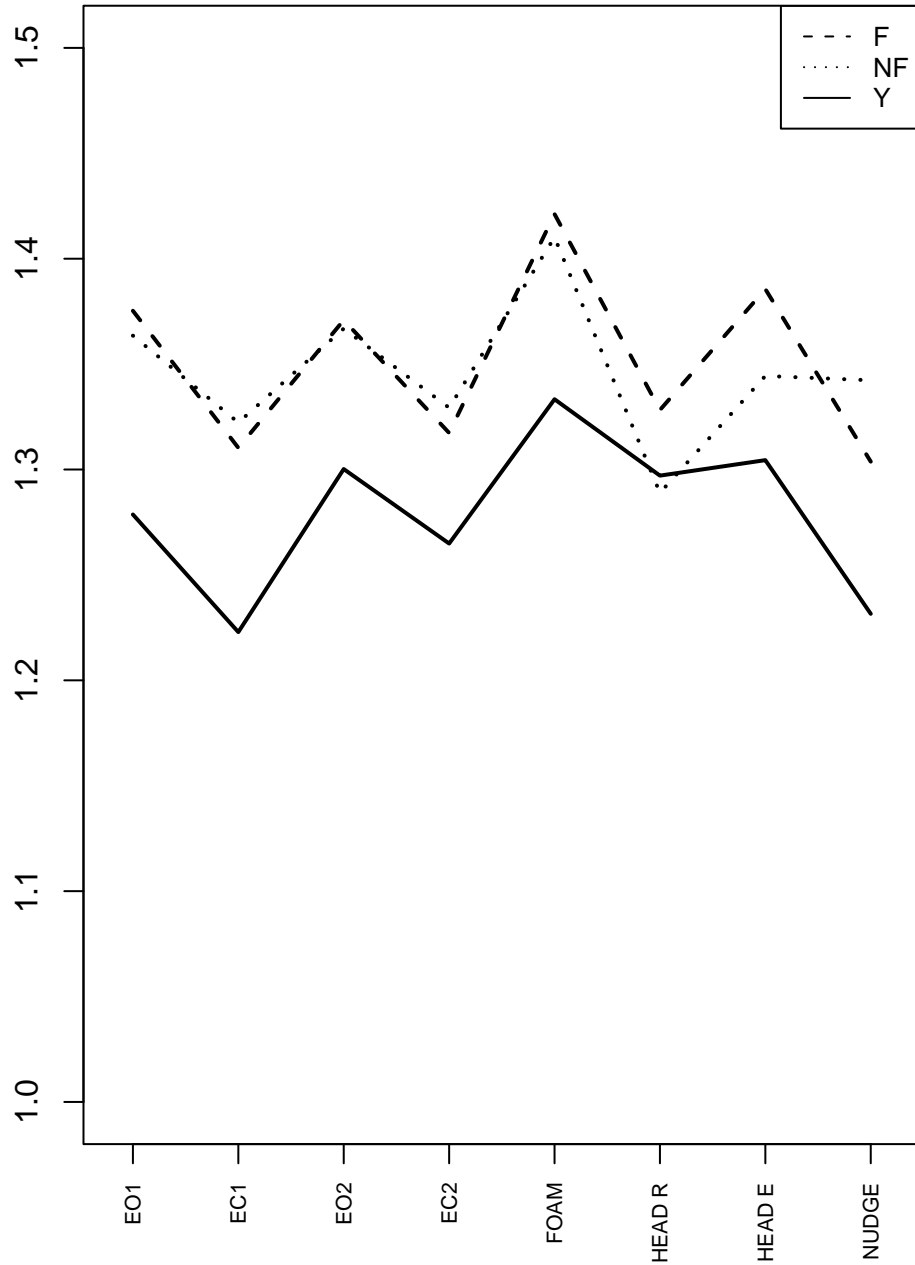

Hurst ss-exponent  $\alpha(Y)$

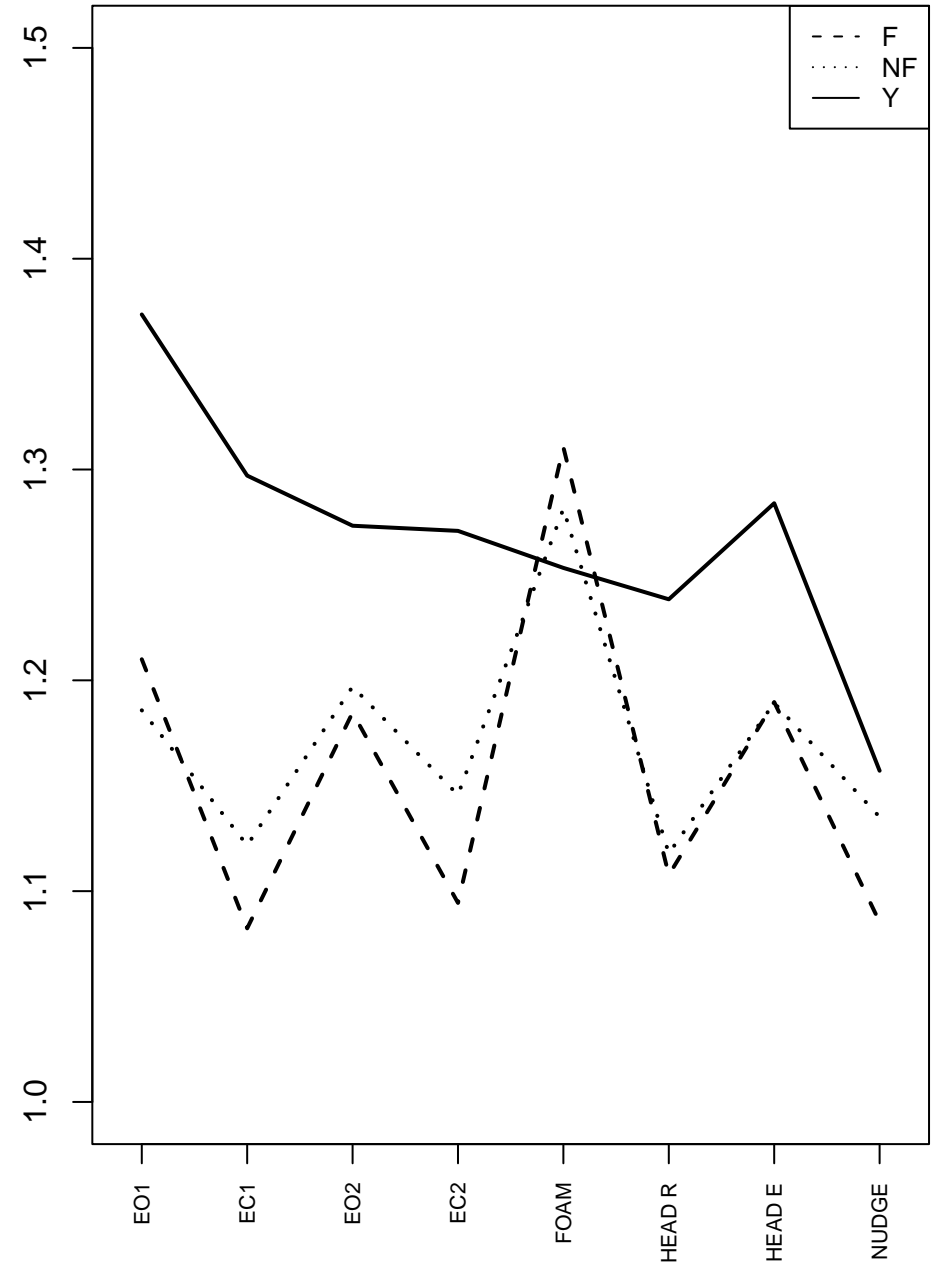

Supplement: MOESM4 [file 9605608]
